# Supplementary material for: Q-Mer Analysis: A Generalized Method for Analyzing RNA-Seq Data
Source: Research Square preprint supplement (doi:10.21203/rs.3.rs-914457/v1), 2021-09-28
Supplement: Supplementary file 1 [file 2d5ddaa852123593cb8d563f.docx]

**Additional Files:**

- File name: Additional file 1
- File format: .png
- Title of data: PCA of the gene expression table without gene selection.
- Description of data: PCA of the gene expression table without gene selection for studying cocaine addiction (**a**) and childhood-onset schizophrenia (COS) (**b**).
- File name: Additional file 2
- File format: .tiff
- Title of data: Example alignments near the region where the oligomers in Figure 5(**c**) are mapped.
- Description of data: The positions of the oligomers are indicated by green dotted lines.
- File name: Additional file 3
- File format: .png
- Title of data: PCA of the gene expression table with the genes in Figure 5(**c**) and in Figure 6(**c**).
- Description of data: PCA of the gene expression table with the genes selected in Figure 5(**c**) for the study of cocaine addiction (**a**) and in Figure 6(**c**) for the study of childhood-onset schizophrenia (COS) (**b**).
- File name: Additional file 4
- File format: .tiff
- Title of data: Example alignments near the region where the oligomers in Figure 6(**c**) are mapped.
- Description of data: The position of the oligomers is indicated by the arrow.
