# Supplementary material for: Q-Mer Analysis: A Generalized Method for Analyzing RNA-Seq Data
Source: Research Square preprint supplement (doi:10.21203/rs.3.rs-914457/v1), 2021-09-28
Supplement: Supplementary file 1 [file e3fc5f7c91b4d060046a5ce5.docx]

**Additional Files**

**
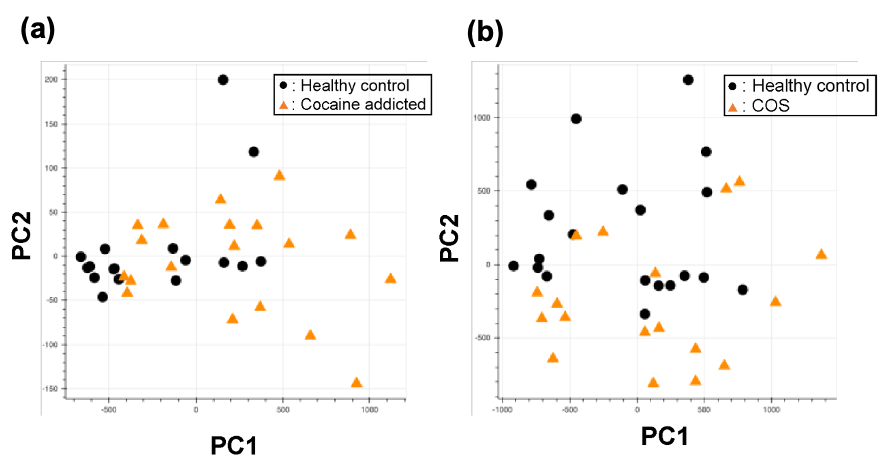
**

**Additional file 1:** **Figure S1.** PCA of the gene expression table without gene selection for the study of cocaine addiction (**a**) and childhood-onset schizophrenia (COS) (**b**).

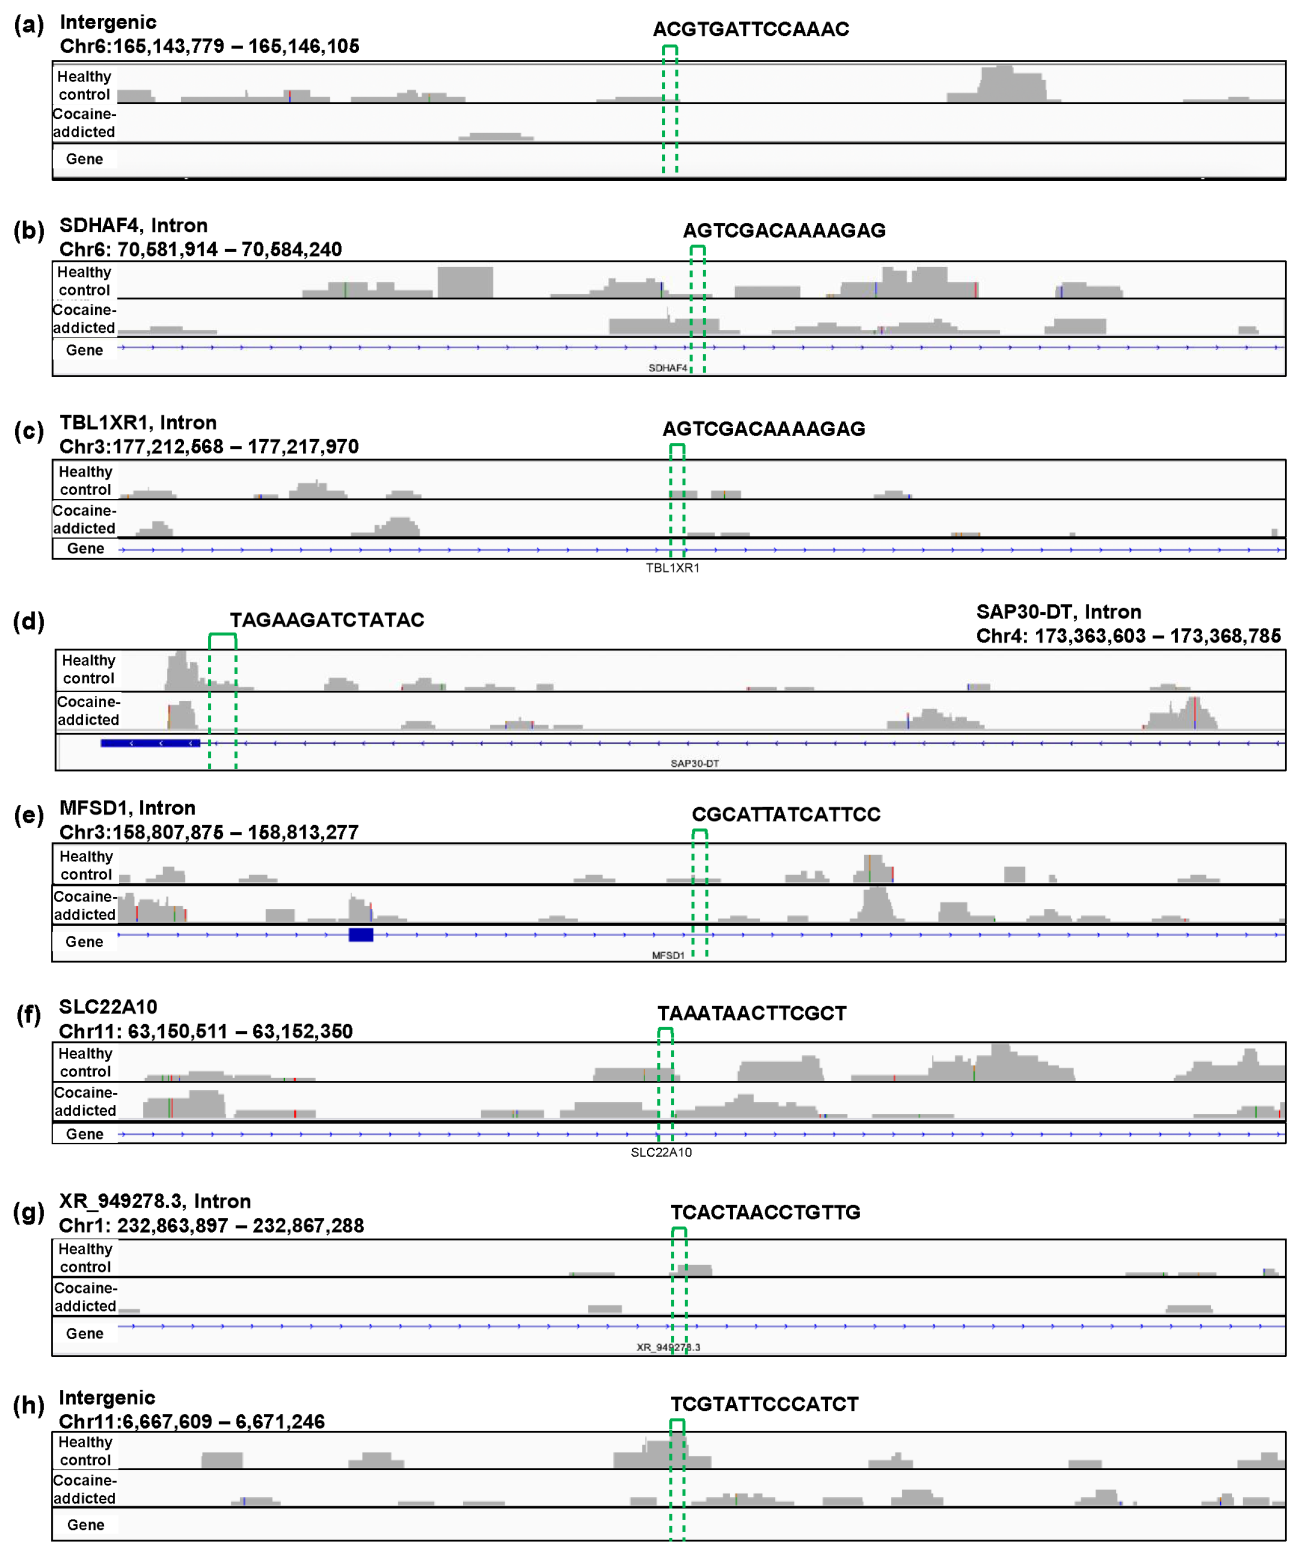

**Additional file 2:** **Figure S2.** Example alignments near the region where the oligomers in Figure 5(**c**) are mapped. The positions of the oligomers are indicated by green dotted lines.

**
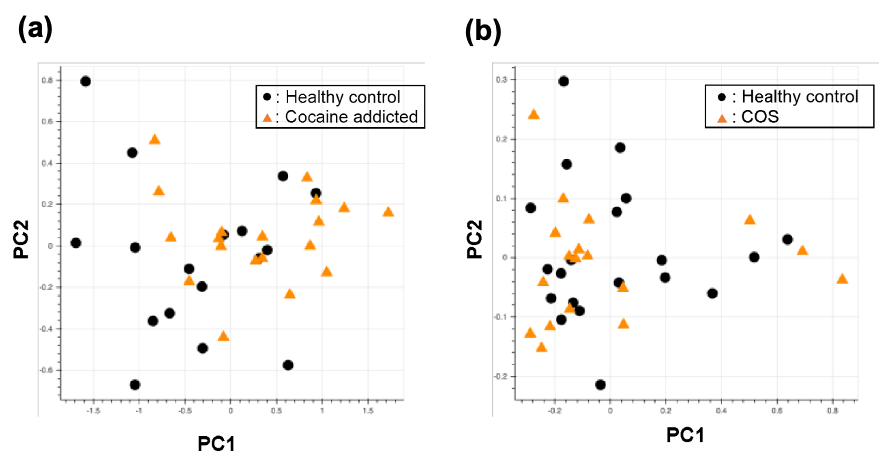
**

**Additional file 3:** **Figure S3.** PCA of the gene expression table with the genes in Figure 5(**c**) and in Figure 6(**c**).

**
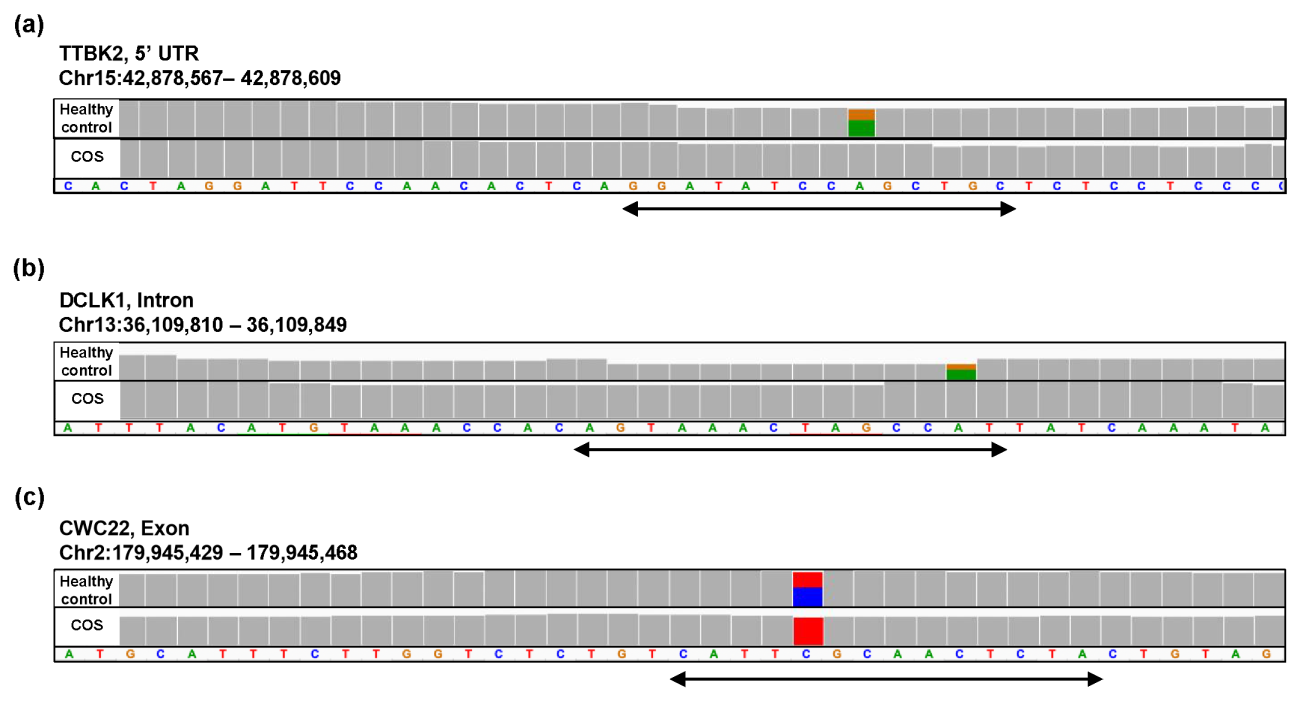

Additional file 4:** **Figure S4.** Example alignments near the region where the oligomers in Figure 6(**c**) are mapped. The position of the oligomers is indicated by the arrow.
